# Supplementary material for: Thermotropic dynamic processes in multiphase polymer systems by (cryo-)AFM
Source: Royal Society of Chemistry journal article supplement (doi:10.1039/c4sm00458b), 2014-01-01
Supplement: c4sm00458b1.pdf [file c4sm00458b1.pdf]

## Thermotropical dynamical processes in multiphase polymer systems by (cryo-) AFM.

### Supporting Information

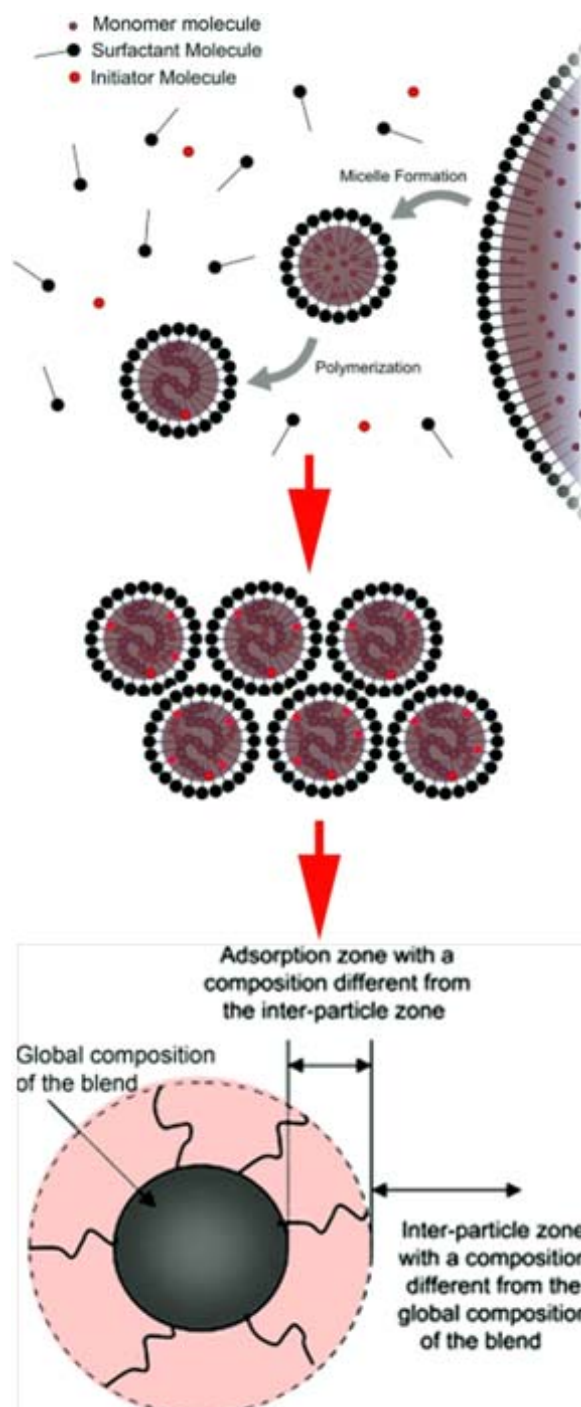

**Figure SI 1.** Schematic description of production of conventional nitrile butadiene rubber (NBR). Retrieved from: H. B. Yamak, Emulsion Polymerization: Effects of Polymerization Variables on the Properties of Vinyl Acetate Based Emulsion Polymers in Polymer Science (Ed. Faris Yılmaz), Intech, 2013 (under Open Access License).
